# Supplementary material for: Cell surface flip-flop of phosphatidylserine is critical for PIEZO1-mediated myotube formation
Source: PubMed Central journal article supplement (PMC5967302; doi:10.1038/s41467-018-04436-w), 2018-05-24
Supplement: 41467_2018_4436_MOESM1_ESM.pdf [file 41467_2018_4436_MOESM1_ESM.pdf]

## **Supplementary Information**

# **Cell surface flip-flop of phosphatidylserine is critical for PIEZO1-mediated myotube formation**

**Tsuchiya et al.**

**Supplementary Figures 1-8**

**Supplementary Tables 1-4**

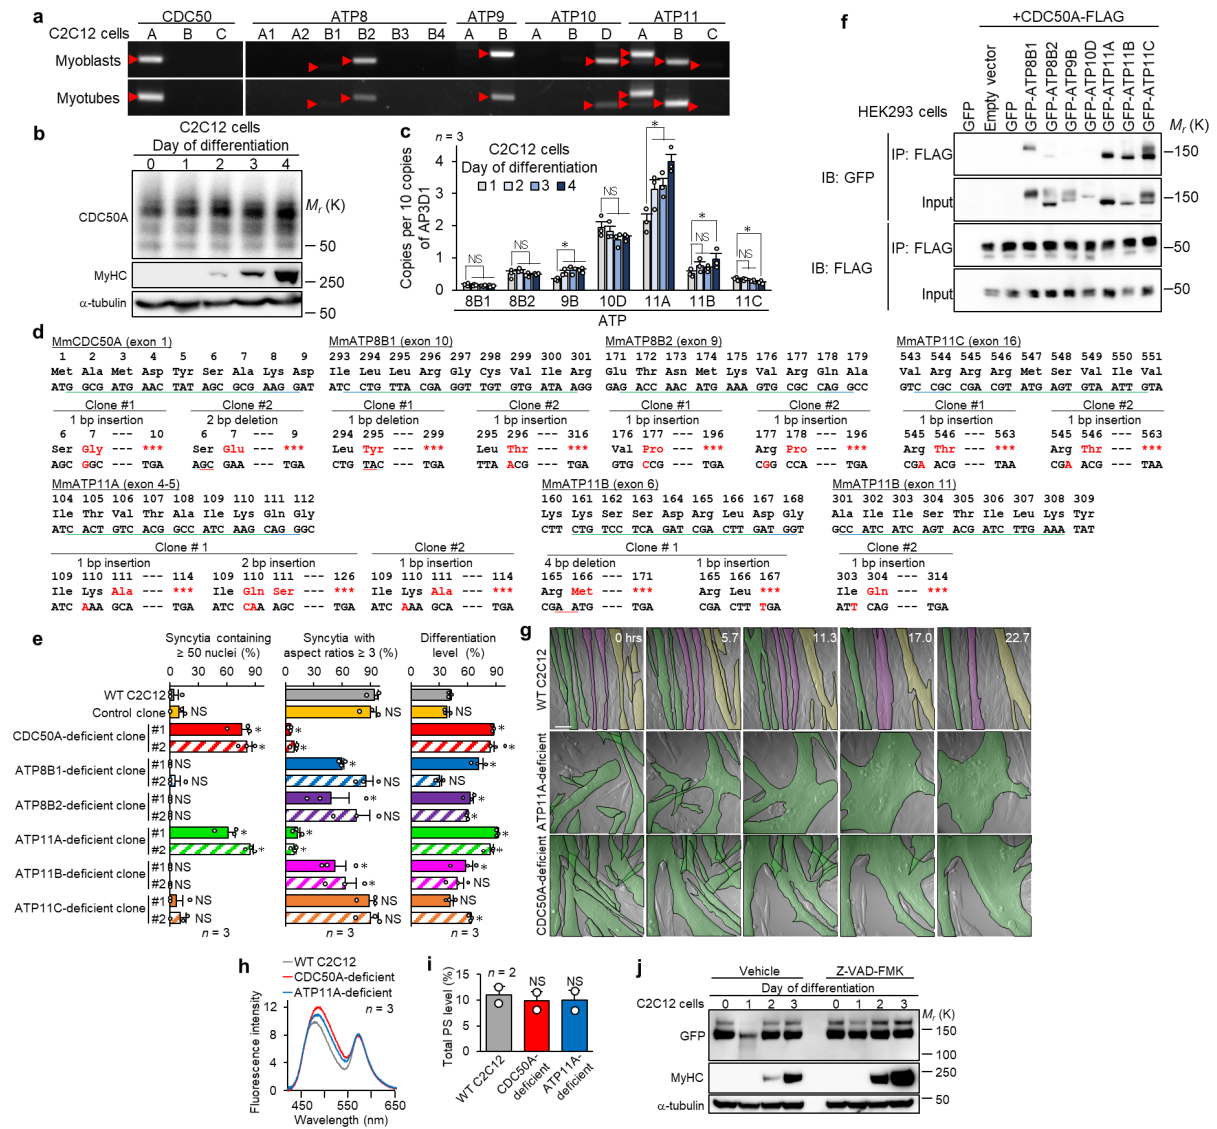

**Supplementary Figure 1. Supporting data for defective myotube formation by CDC50A- and ATP11A-deficient C2C12 myoblasts. (a-c)** Expression of phospholipid flippase complex components in C2C12 cells. **(a)** Semi-quantitative RT-PCR analysis of CDC50 family members and P4-ATPases in proliferating myoblasts and differentiated myotubes from C2C12 cells. Red arrowheads denote specific bands. **(b)** Immunoblot analysis of CDC50A in differentiated C2C12 cells. MyHC and  $\alpha$ -tubulin were detected as a differentiation marker and a loading control, respectively. **(c)** Quantitative RT-PCR analysis of P4-ATPases (compared to AP3D1) in differentiated C2C12 cells. **(d-g)** Defective myotube formation by C2C12 myoblasts deficient in the PS flippase complex of ATP11A and CDC50A. **(d)** CRISPR/Cas9 target sites in the indicated genes of C2C12 cells. The guide sequence and the protospacer-adjacent motif in each gene are underlined in green and blue, respectively. CRISPR/Cas9-introduced insertions or deletions are shown in red characters. **(e)** Characterization of myotube formation in control and flippase-deficient C2C12 clones by immunofluorescence imaging of MyHC. Quantification of cell fusion (left), polarized elongation (middle) and differentiation (right). **(f)** Immunoblot analysis (IB) of CDC50A-associated P4-ATPases in anti-FLAG immunoprecipitates (IP) of HEK293 cells co-expressing FLAG-tagged CDC50A and one of the GFP-tagged P4-ATPases visualized with anti-FLAG and anti-GFP antibodies. **(g)** Time-lapse images of myotube formation in WT, CDC50A- and ATP11A-deficient C2C12 cells, began at 2 days (0 hrs) after induction of differentiation. These images were selected from Supplementary Movies 1-3. Syncytia are pseudo-coloured and the cell periphery is indicated by a black line. **(h)** Increased anionic phospholipids on the cell surface of PS flippase-deficient myoblasts. Fluorescent spectra of F2N12S (a membrane asymmetry probe sensitive to anionic phospholipids in the plasma membrane outer leaflet) in WT, CDC50A- and ATP11A-deficient C2C12 myoblasts. **(i)** Normal PS content in PS flippase-deficient myoblasts. Thin-layer chromatography analysis of total PS levels in WT, CDC50A- and ATP11A-deficient C2C12 myoblasts. **(j)** Transient ATP11A degradation by caspases during myotube formation. Immunoblot analysis of differentiated C2C12 cells stably expressing ATP11A-GFP in the presence or absence of Z-VAD-FMK using anti-GFP, anti-MyHC and anti- $\alpha$ -tubulin antibodies. \* $P < 0.05$  (Student's t-test). NS, not significant.  $n$ , sample number. Error bars represent the S.E.M. Scale bar, 50  $\mu$ m (g).

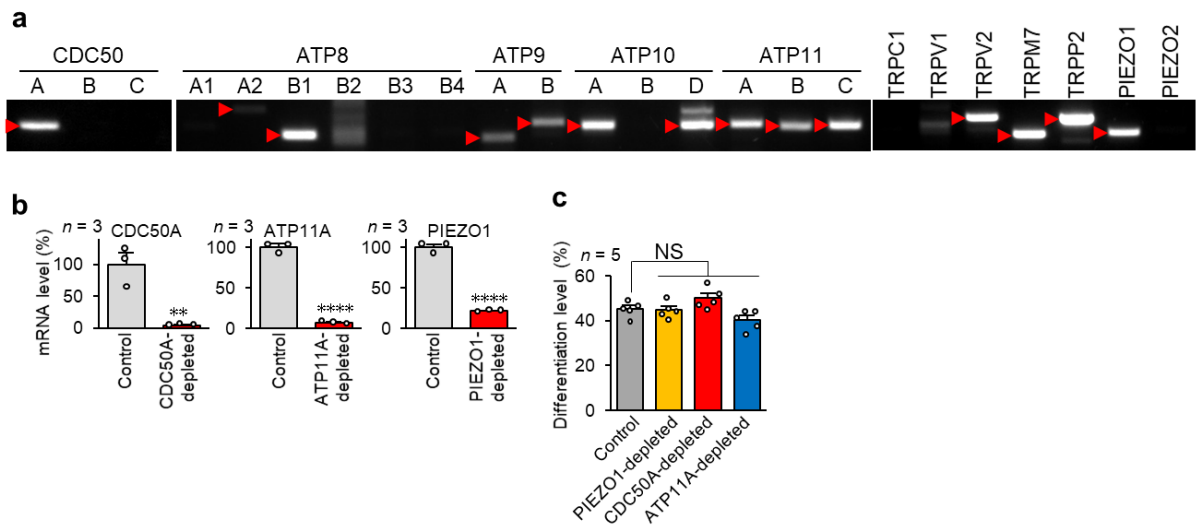

**Supplementary Figure 2. Supporting data for defective myotube formation by PS flippase- and PIEZO1-depleted human primary myoblasts.** (a) Semi-quantitative RT-PCR analysis of CDC50 family members, P4-ATPases and a series of Ca<sup>2+</sup>-permeable mechanosensitive channels in human primary myoblasts. Red arrowheads denote specific bands. (b) Quantitative RT-PCR analysis of PIEZO1, CDC50A and ATP11A in human primary myoblasts transfected with non-targeting negative control siRNA or siRNA against the corresponding genes. *GAPDH* was used as the reference gene. (c) Quantification of differentiation in Fig. 1c and 2c. \*\**P* < 0.01 and \*\*\*\**P* < 0.0001 (Student's t-test). NS, not significant. *n*, sample number. Error bars represent the S.E.M.

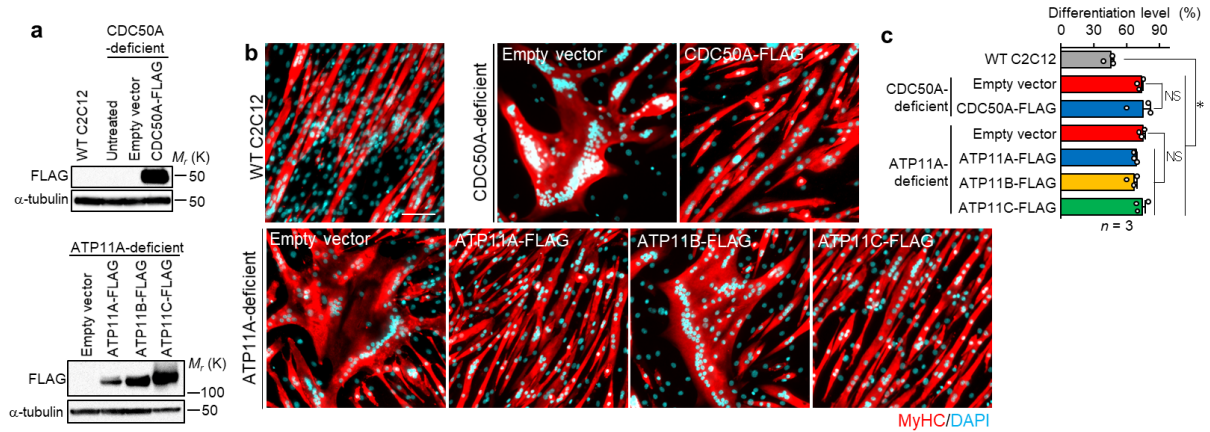

**Supplementary Figure 3. Supporting data for rescue of morphologies in PS flippase-deficient C2C12 myotubes by overexpression of PS flippase complex components.** (a) Immunoblot analysis of WT, CDC50A- and ATP11A-deficient C2C12 cells infected with retroviruses expressing FLAG-tagged proteins. (b) Synectia formed by WT, CDC50A- or ATP11A-deficient C2C12 myoblasts expressing FLAG-tagged proteins were visualized by immunofluorescent staining with anti-MyHC antibody (differentiated cells, red) and DAPI (nuclei, cyan). (c) Quantification of differentiation in b.  $*P < 0.05$  (Student's t-test). NS, not significant.  $n$ , sample number. Error bars represent the S.E.M. Scale bar, 100  $\mu\text{m}$  (b).

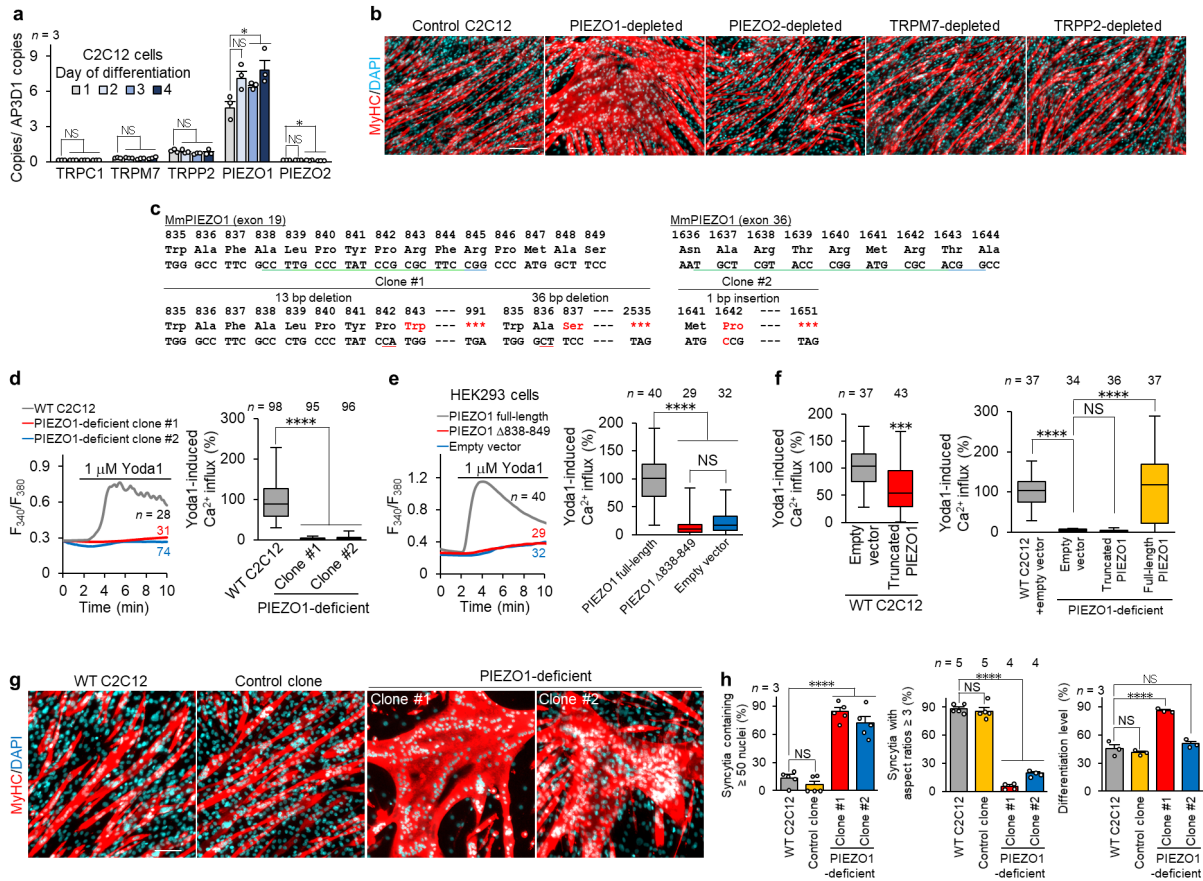

**Supplementary Figure 4. Supporting data for defective myotube formation by PIEZO1-deficient C2C12 myoblasts. (a)** Quantitative RT-PCR analysis of the  $\text{Ca}^{2+}$ -permeable mechanosensitive channels (compared to AP3D1) in differentiated C2C12 cells. **(b)** Defective myotube formation by PIEZO1-depleted C2C12 myoblasts. Morphologies of C2C12 myotubes transfected with siRNA against PIEZO1, PIEZO2, TRPM7 and TRPP2, stained for MyHC and nuclei. **(c)** CRISPR/Cas9 target sites in the PIEZO1 gene of C2C12 cells. The guide sequence and the protospacer-adjacent motif are underlined in green and blue, respectively. CRISPR/Cas9-induced insertions or deletions are shown in red characters. **(d)** Suppression of Yoda1-induced  $\text{Ca}^{2+}$  influx in PIEZO1-deficient C2C12 clones. Representative traces (left) and quantification (right) of Yoda1-induced  $\text{Ca}^{2+}$  influx in WT C2C12 cells and PIEZO1-deficient clones. **(e, f)** Impaired channel function of the PIEZO1 mutants identified in the PIEZO1-deficient C2C12 clones. **(e)** Representative traces (left) and quantification (right) of Yoda1-induced  $\text{Ca}^{2+}$  influx in HEK293 cells transfected with PIEZO1 (full-length or  $\Delta 838-849$ ). **(f)** Left: Quantification of Yoda1-induced  $\text{Ca}^{2+}$  influx in WT C2C12 cells transfected with an empty vector or truncated PIEZO1 (13 bp deletion). Right: Quantification of Yoda1-induced  $\text{Ca}^{2+}$  influx in WT and the PIEZO1-deficient C2C12 cells transfected with truncated PIEZO1 (13 bp deletion). **(g, h)** Aberrant myotube morphologies in PIEZO1-deficient C2C12 clones. **(g)** Syncytia formed by WT C2C12 cells, control clones and PIEZO1-deficient clones were visualized by anti-MyHC antibody (differentiated cells, red) and DAPI (nuclei, cyan). **(h)** Quantification of cell fusion (left), polarized elongation (middle) and differentiation (right) in **g**. \* $P < 0.05$ , \*\*\* $P < 0.001$  and \*\*\*\* $P < 0.0001$  (Student's  $t$ -test). NS, not significant.  $n$ , sample number. Bar graphs represent mean  $\pm$  S.E.M. Box and whiskers graph—line: median, box: upper and lower quartiles, whiskers: maxima and minima. Scale bars: 100  $\mu\text{m}$  (b, g).

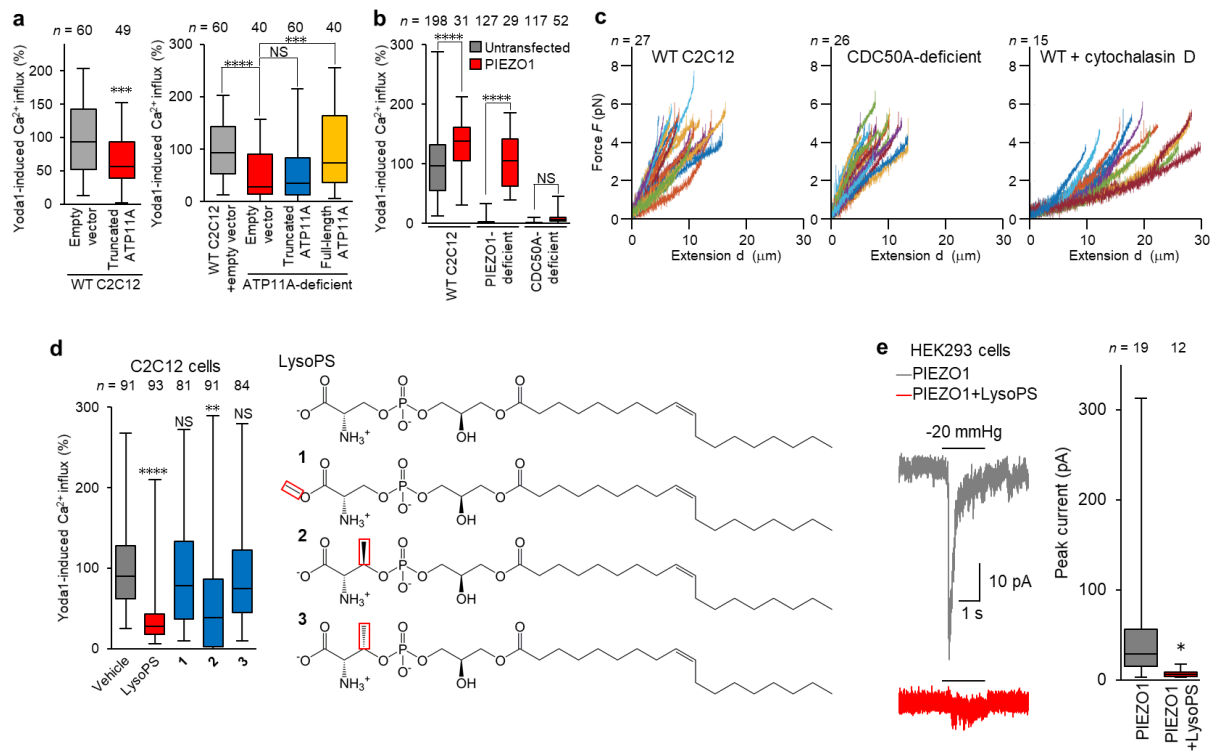

**Supplementary Figure 5. Supporting data for suppression of PIEZO1 activation by PS flippase deficiency and cell surface-inserted LysoPS.** (a) Dysfunction of the ATP11A mutant identified in the ATP11A-deficient C2C12 clones. Quantification of Yoda1-induced  $\text{Ca}^{2+}$  influx in WT (left) or the ATP11A-deficient (right) C2C12 cells expressing truncated ATP11A (1 bp insertion). (b) Failed rescue of impaired PIEZO1 activation in PS flippase-deficient myoblasts by overexpression of PIEZO1. Quantification of Yoda1-induced  $\text{Ca}^{2+}$  influx in WT, the PIEZO1-deficient and CDC50A-deficient C2C12 cells expressing PIEZO1. (c) Force-extension curves for WT, CDC50A-deficient and cytochalasin D-treated WT C2C12 cells. Membrane tension is obtained by linear fitting of the first linear part of the force-extension curve. (d) Stereospecific inhibition of agonist-induced PIEZO1 activation by the phosphoserine headgroup of cell surface-inserted LysoPS. Quantification (left) of Yoda1-induced  $\text{Ca}^{2+}$  influx in WT C2C12 cells treated with LysoPS analogues 1-3 (right). (e) Inhibition of negative suction-induced PIEZO1 activation by cell surface-inserted LysoPS. Traces (left) and quantification (right) of currents recorded with negative pipette pressure ( $-20$  mm Hg) from PIEZO1-expressing HEK293 cells in the presence of LysoPS.  $*P < 0.05$ ,  $**P < 0.01$ ,  $***P < 0.001$  and  $****P < 0.0001$  (Student's *t*-test). NS, not significant. *n*, sample number. Box and whiskers graph—line: median, box: upper and lower quartiles, whiskers: maxima and minima.

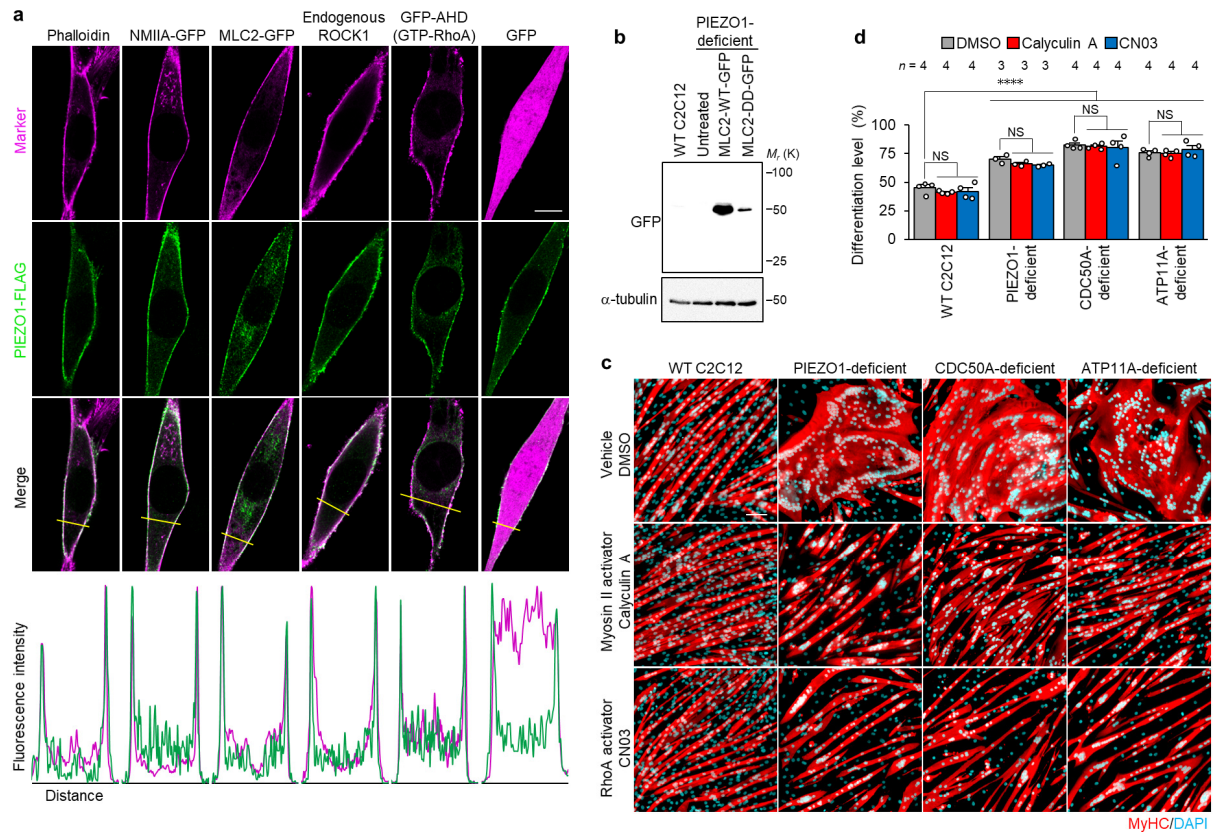

**Supplementary Figure 6. Supporting data for RhoA/ROCK-mediated actomyosin formation via the PS flippase/PIEZO1 pathway.** (a) Colocalization of PIEZO1 with F-actin, NMIIA, MLC2, ROCK1 and active RhoA at the cell cortex of bipolar C2C12 myoblasts. Immunofluorescent analysis of WT C2C12 cells expressing PIEZO1-FLAG alone or with NMIIA-GFP, MLC2-GFP, GFP-AHD or GFP, visualized by phalloidin, anti-FLAG, anti-GFP and anti-ROCK1 antibodies. Fluorescence profiles at yellow lines are shown at the bottom. (b) Immunoblot analysis of WT C2C12 cells and PIEZO1-deficient cells untreated or stably expressing MLC2-WT-GFP or MLC2-DD-GFP, visualized by anti-GFP and anti- $\alpha$ -tubulin antibodies. (c) Rescue of myotube formation by activation of the RhoA/ROCK/actomyosin pathway in PS flippase- or PIEZO1-deficient C2C12 syncytia. Morphology of myotubes formed by WT, PIEZO1-, CDC50A- and ATP11A-deficient C2C12 cells treated with DMSO, calyculin A and CN03, stained for MyHC and nuclei. (d) Quantification of differentiation in c. \*\*\*\* $P < 0.0001$  (Student's *t*-test). NS, not significant. *n*, sample number. Bar graphs represent mean  $\pm$  S.E.M. Scale bars: 10  $\mu$ m (a), 100  $\mu$ m (c).

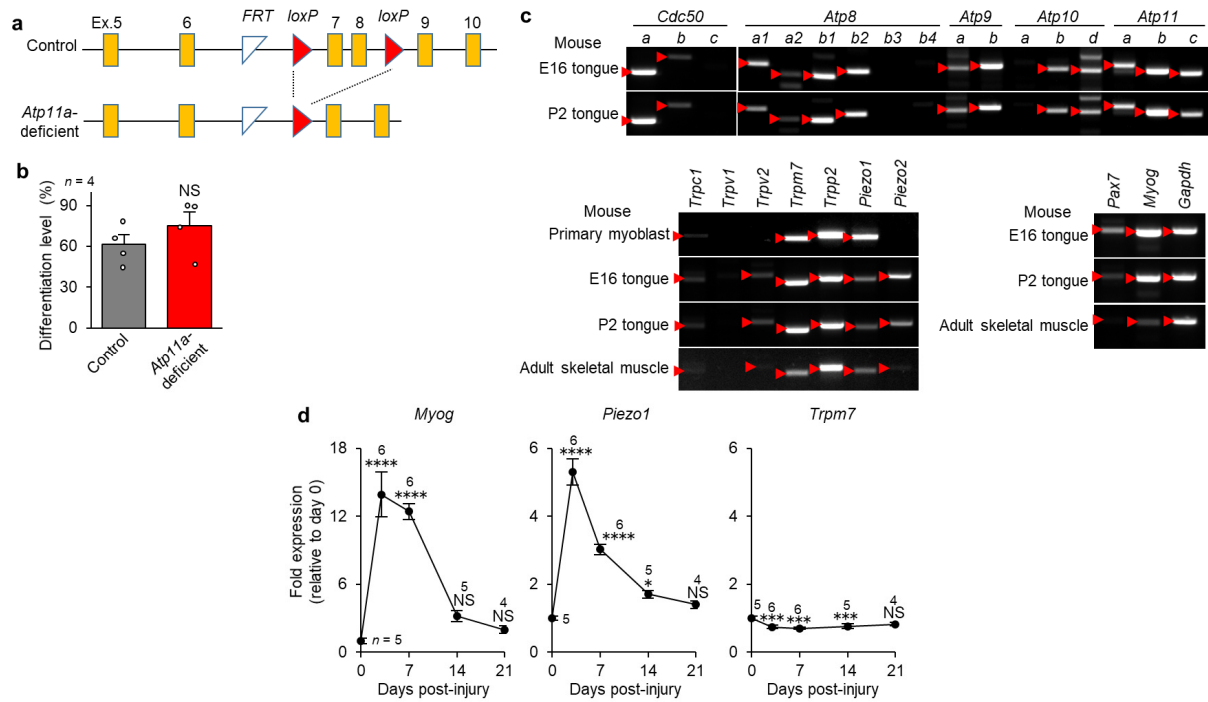

**Supplementary Figure 7. Supporting data for a role of ATP11A in morphogenesis during myofibre regeneration.** (a) The strategy for generation of *Atp11a*-deficient mice. *Atp11a<sup>tm1c</sup>* was crossed with the *Myf5*-cre transgenic mice, resulting in the removal of exons 7 and 8 in myoblasts. (b) Quantification of differentiation in Fig. 8a. (c) Semi-quantitative RT-PCR analysis of CDC50 family members, P4-ATPases, mechanosensitive cation channels and differentiation markers in mouse primary myoblasts, tongue (E16 and P2) and adult skeletal muscle. Red arrowheads denote specific bands. (d) *In silico* analysis of *Myog* (a myogenic marker), *Piezo1* and *Trpm7* expression during myofibre regeneration after muscle injury. \* $P < 0.05$ , \*\*\* $P < 0.001$  and \*\*\*\* $P < 0.0001$  (Student's *t*-test). NS, not significant. *n*, sample number. Bar graphs represent mean  $\pm$  S.E.M.



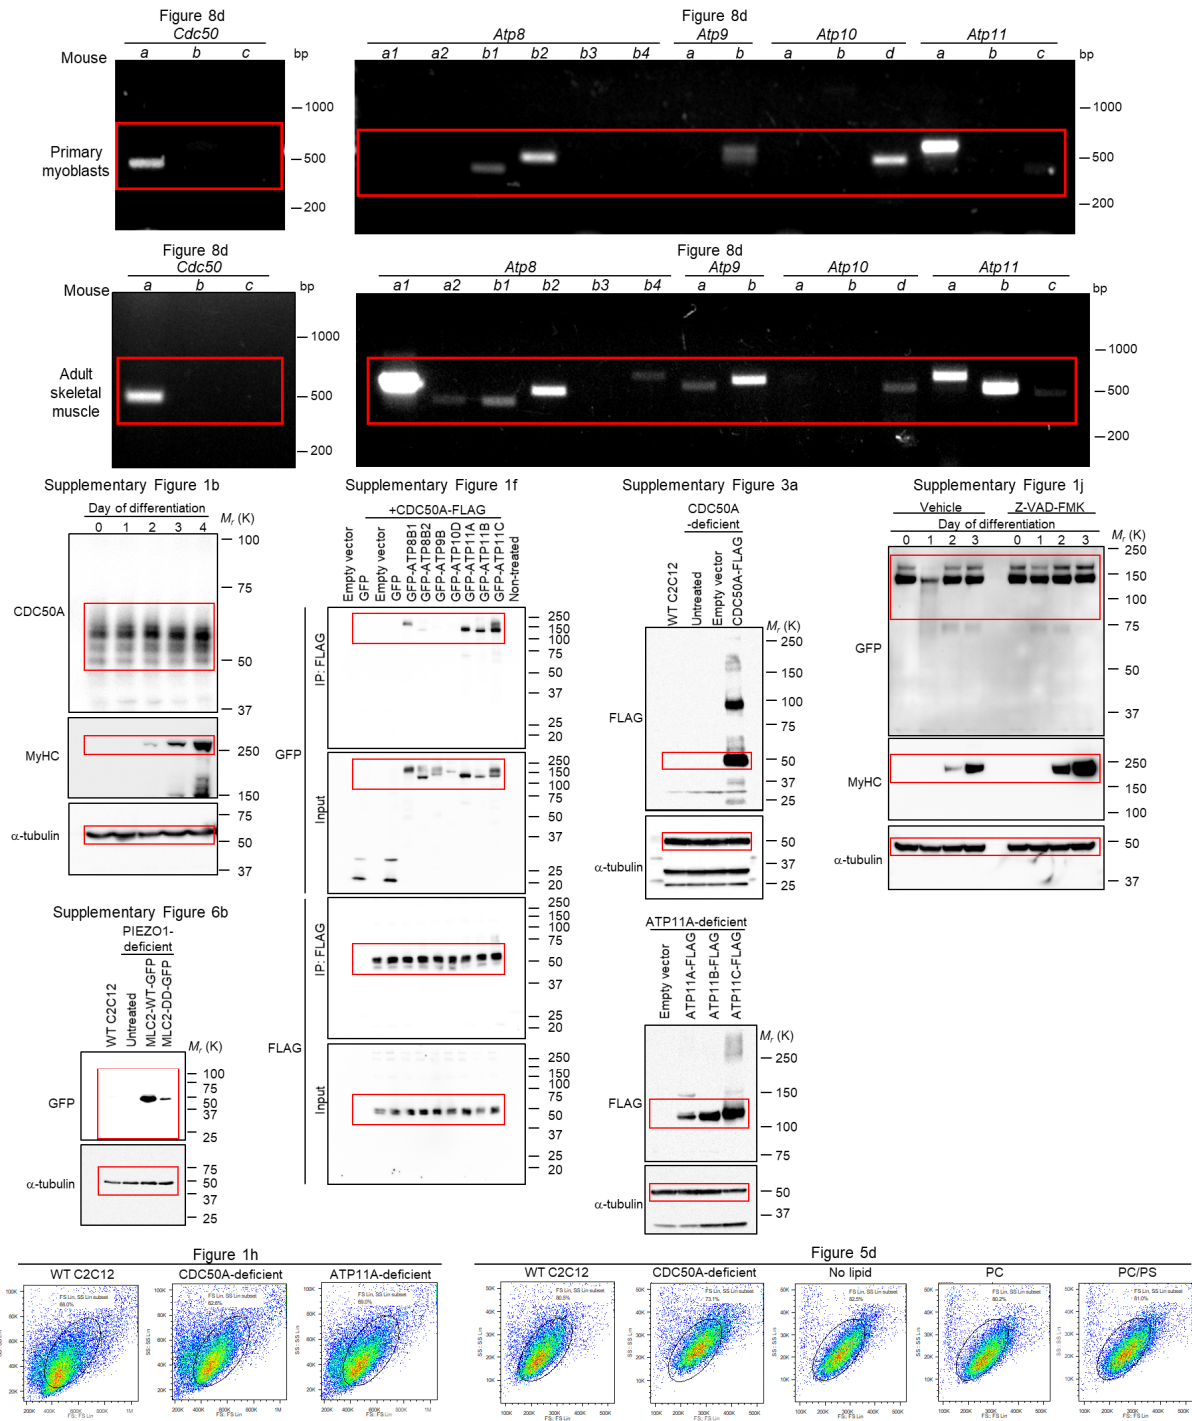

Supplementary Figure 8. Uncropped images of the scans and flow cytometry gating strategies.

### Supplementary Table 1. siRNA information.

| Target                | Species      | siRNA ID                                 | Supplier      |
|-----------------------|--------------|------------------------------------------|---------------|
| Non-targeting control | human, mouse | MISSION siRNA universal Negative Control | Sigma-Aldrich |
| Piezo1 (Fam38a)       | mouse        | SASI_Mm01_00281158                       | Sigma-Aldrich |
| Piezo2 (Fam38b)       | mouse        | SASI_Mm02_00405285                       | Sigma-Aldrich |
| Trpp2 (Pkd2)          | mouse        | SASI_Mm01_00024215                       | Sigma-Aldrich |
| Trpm7                 | mouse        | s81668                                   | Ambion        |
| PIEZO1 (FAM38A)       | human        | SASI_Hs01_00208584                       | Sigma-Aldrich |
| CDC50A (TMEM30A)      | human        | SASI_Hs01_00054522                       | Sigma-Aldrich |
| ATP11A                | human        | SASI_Hs01_00106358                       | Sigma-Aldrich |

### Supplementary Table 2. Antibody information.

| Antibodies                       | Host   | Clonality        | Usage | Dilution      | Catalog number | Supplier          |
|----------------------------------|--------|------------------|-------|---------------|----------------|-------------------|
| Anti-FLAG                        | Mouse  | Monoclonal, M2   | WB    | 1:1000        | F1804          | Sigma-Aldrich     |
| Anti-GFP                         | Rabbit | Polyclonal       | WB    | 1:1000        | 598            | MBL               |
|                                  |        |                  | IF    | 1:1000        |                |                   |
| Anti-CDC50A                      | Rabbit | Polyclonal       | WB    | 1:100         |                | In house          |
| Anti-NMIIA                       | Rabbit | Polyclonal       | IF    | 1:50          | M8064          | Sigma-Aldrich     |
| Anti-myosin-heavy-chain          | Mouse  | Monoclonal, MF20 | IF    | 1:500         | 14-6503-82     | eBioscience       |
| Anti-phospho(S19)-MLC2           | Rabbit | Polyclonal       | IF    | 1:50          | 3671           | CST               |
| Anti-ROCK1                       | Rabbit | Polyclonal       | IF    | 1:100         | GTX113266      | GeneTex           |
| Anti- $\alpha$ -tubulin          | Rabbit | Polyclonal       | WB    | 1:1000        | PM054          | MBL               |
| Anti-PIEZO1                      | Rabbit | Polyclonal       | IF    | 1:200         | NBP1-78446     | Novus Biologicals |
| Anti-PAX7                        | Mouse  | Monoclonal       | IF    | 1:3           | 528428         | DSHB              |
| Anti-laminin                     | Rabbit | Polyclonal       | IF    | 1:500         | L9393          | Sigma-Aldrich     |
| HRP-linked-anti-mouse IgG        | Sheep  | Polyclonal       | WB    | 1:2000-1:4000 | NA931V         | GE Healthcare     |
| HRP-linked-anti-rabbit IgG       | Sheep  | Polyclonal       | WB    | 1:2000-1:4000 | NA934V         | GE Healthcare     |
| Anti-mouse IgG, Alexa Fluor 555  | Goat   | Polyclonal       | IF    | 1:500         | A-21424        | Thermo            |
| Anti-rabbit IgG, Alexa Fluor 488 | Goat   | Polyclonal       | IF    | 1:500         | A-11034        | Thermo            |
| Anti-goat IgG, Alexa Fluor 488   | Donkey | Polyclonal       | IF    | 1:500         | A-11055        | Thermo            |

**Supplementary Table 3. Mouse qPCR primers.**

| Target   |   | Test      | Sequence                | bp            |
|----------|---|-----------|-------------------------|---------------|
| Cdc50a   | F | semi-qPCR | CAGTCATTTGAGGGCAATGTGT  | 470           |
|          | R |           | GCTGCAGTACGCATCCAAAC    |               |
| Cdc50b   | F | semi-qPCR | GGCCCCGTGTACCTCTACTA    | 684           |
|          | R |           | AAAGCCCATGACGATGCAGA    |               |
| Cdc50c   | F | semi-qPCR | ATCCGTTCCAAGTGTCCAC     | 531           |
|          | R |           | CCCCGTCACGTGTAAGTC      |               |
| Atp8a1   | F | semi-qPCR | TTGTCTACACTGGCCACGAC    | 551           |
|          | R |           | TGAGCTCTGCCATTTCATCGG   |               |
| Atp8a2   | F | semi-qPCR | TCATCGAGCTATGGTTCGCC    | 400           |
|          | R |           | GTCCAAGCTGTCTCTCCAA     |               |
| Atp8b1   | F | semi-qPCR | CTGGATCAGGACGTGAGTGAC   | 391           |
|          | R |           | TGAACTGAAATGCCGACGGA    |               |
| Atp8b2   | F | semi-qPCR | CGGGCTAACGACCGTGAATA    | 471           |
|          | R |           | GTTGGTCTCTCCATCCAGCTC   |               |
| Atp8b3   | F | semi-qPCR | ACGATGAACATGGGACGCTT    | 386           |
|          | R |           | CTCTGGGTTTCGGACCAACA    |               |
| Atp8b4   | F | semi-qPCR | GCAGACACGAGGAGTGAACA    | 612           |
|          | R |           | GGTTTGTTCCTCCGCAAGC     |               |
| Atp9a    | F | semi-qPCR | GAAGCGGGTGGACAGTAGGC    | 517           |
|          | R |           | GCAAGAGCCGTTTTCTCTGAC   |               |
| Atp9b    | F | semi-qPCR | GTATCCATGACCCGGCTCTG    | 561           |
|          | R |           | AAGCCTGTTGCCCTCCTT      |               |
| Atp10a   | F | semi-qPCR | CTGACTGTGGTGTCTGTGCG    | 598           |
|          | R |           | CCTCTTTTCTCCCTGCTGAAGAC |               |
| Atp10b   | F | semi-qPCR | GTCACTACGCAGGCCATGA     | 508           |
|          | R |           | ATTCCGCTGCCACAATGGTA    |               |
| Atp10d   | F | semi-qPCR | GAACAGTTTCACAGGGCTGC    | 491           |
|          | R |           | CGGAATCGGCTGAGGTCATT    |               |
| Atp11a   | F | semi-qPCR | TGACCATCAACGGACAGATGTT  | 480, 565, 584 |
|          | R |           | TGGAGCACACAACCTCTCCCA   |               |
| Atp11b   | F | semi-qPCR | GTCTCTTGCTCTGGAGCC      | 487           |
|          | R |           | TATCCACCTGCCCAAGCTCT    |               |
| Atp11c   | F | semi-qPCR | GCGAGCTAGCTGTCCGCTT     | 450           |
|          | R |           | AAGCCAATCTTACATCCCTGC   |               |
| Trpc1    | F | semi-qPCR | CGTGCGACAAGGGTGAATAT    | 643           |
|          | R |           | AACATTTTGCACCTGACGGGC   |               |
| Trpv1    | F | semi-qPCR | GGGAGGCCACTTACCACA      | 594           |
|          | R |           | CTTCCCGTCTCTGGGCTTTT    |               |
| Trpv2    | F | semi-qPCR | TCCGAAAGTTCACCGAG       | 598           |
|          | R |           | TGTAGATGCCTGTGTGCTG     |               |
| Trpm7    | F | semi-qPCR | ATTTGCCCGTGATACCCAG     | 496           |
|          | R |           | CAGCTTCTGCTTGACCCG      |               |
| Trpp2    | F | semi-qPCR | GTGTGGTCAGGTTATTGGCG    | 573           |
|          | R |           | TGCTGAAGTCATCGACCTGG    |               |
| Piezo1   | F | semi-qPCR | ACATTGCATCCTCGCTGTCA    | 522           |
|          | R |           | CCTTGGGCTGGGGTATTTTC    |               |
| Piezo2   | F | semi-qPCR | TTGTTTCAAGGGTTCGGCT     | 583           |
|          | R |           | AGCAACTATTGGGTCGGTG     |               |
| Pax7     | F | semi-qPCR | CTGGAAGTGTCCACCCCTCT    | 532           |
|          | R |           | CCACATCTGAGCCCTCATCC    |               |
| Myog     | F | semi-qPCR | CCCACCCAGGAGATCATTTG    | 506           |
|          | R |           | AGGTCAGGGCACTCATGTCT    |               |
| Gapdh    | F | semi-qPCR | TGAAGGGTGGAGCCAAAAGG    | 545           |
|          | R |           | GGAAGAGTGGGAGTTGCTGTTG  |               |
| Atp8b1   | F | qPCR      | TGCGGTGTGCTTACTACCTG    | 208           |
|          | R |           | GGAGATGAGGCTGCGTAGC     |               |
| Atp8b2   | F | qPCR      | CAGGCCAGTTGAACCTCCTA    | 198           |
|          | R |           | GCACACTGACCACAATGACC    |               |
| Atp9b    | F | qPCR      | CGAGTTTGTCCATGTTGTTG    | 193           |
|          | R |           | GAAAGCGCCAAAAGACACTC    |               |
| Atp10d   | F | qPCR      | CCGTGTTTCCATCTCCAGTT    | 171           |
|          | R |           | CAGAAGACCCAGGTGTTGGT    |               |
| Atp11a   | F | qPCR      | CTGGCGGGTGTTCATTTACT    | 167           |
|          | R |           | TGACAGTGAGCACCATCACA    |               |
| Atp11b   | F | qPCR      | TTTTGGGCTCCCAGAAATAG    | 246           |
|          | R |           | TTCTTCCAACAGACGCACAC    |               |
| Atp11c   | F | qPCR      | TTACAGTTGGGGCCCTTCTT    | 193           |
|          | R |           | TATCCAAGGCGAGCTTCAGA    |               |
| Piezo1   | F | qPCR      | ATCCTGCTGTATGGGCTGAC    | 127           |
|          | R |           | AAGGGTAGCGTGTGTGTTCC    |               |
| Piezo2   | F | qPCR      | CGCTCAGAAATGGTGTGCTA    | 88            |
|          | R |           | AGATCAAGATGGGCAACAGG    |               |
| Trpc1    | F | qPCR      | AGCCTCTTGACAACGAGGA     | 171           |
|          | R |           | TCTTACAGGTGGGCTTACGG    |               |
| Trpm7    | F | qPCR      | AGGATGTCAGATTTGTCAGCAAC | 128           |
|          | R |           | CCTGGTTAAAGTGTTCACCCAA  |               |
| Trpp2    | F | qPCR      | AGGTGTTAGGACGGCTGCT     | 72            |
|          | R |           | CCCTGTGGATCTCACTGTCC    |               |
| Ap3d1    | F | qPCR      | AGGCTCAGAAAAAGGTCCCA    | 214           |
|          | R |           | AAGGGTTGTTGGCTTGTTT     |               |
| Gapdh    | F | qPCR      | AAGGTCATCCAGAGCTGAA     | 138           |
|          | R |           | CTGCTTACCACCTTCTTGA     |               |
| 18S rRNA | F | qPCR      | CGCCGCTAGAGGTGAAATTTCT  | 101           |
|          | R |           | CGAACCTCCGACTTTCGTTCT   |               |

**Supplementary Table 4. Human qPCR primers.**

| Target |   | Test      | Sequence                  | bp       |
|--------|---|-----------|---------------------------|----------|
| CDC50A | F | semi-qPCR | GAAAAAGAAAGGTATTGCTTGGTG  | 483      |
|        | R |           | GTAATGTCAGCTGTATTACTACTG  |          |
| CDC50B | F | semi-qPCR | CCGACTACCCAGCTCAAGTTCC    | 402      |
|        | R |           | AAAGCCGGTGAGGATGCAGAG     |          |
| CDC50C | F | semi-qPCR | GGACAGATAAGTATGTCAAATTC   | 483      |
|        | R |           | TTTTTTGAAAGTGGGAAAGGCAG   |          |
| ATP8A1 | F | semi-qPCR | GGCCTGCAGGCAGCTAATTCC     | 347      |
|        | R |           | GTGTTGAAGTCCAGGGCATTG     |          |
| ATP8A2 | F | semi-qPCR | GTCAGTGCATCAACGCCTTGG     | 481      |
|        | R |           | TTGCTATCCCGCAGCACCGCTTT   |          |
| ATP8B1 | F | semi-qPCR | GTGGCCTCCACCAACCGGG       | 298      |
|        | R |           | CACCTCTATTCTCTGGTTTTCC    |          |
| ATP8B2 | F | semi-qPCR | GGGAGAGAGGCCTGAACCTG      | 331      |
|        | R |           | GAAGTCCAGGATGCCAGCAG      |          |
| ATP8B3 | F | semi-qPCR | GCCTGCTGTCCATCACCATTG     | 354      |
|        | R |           | GTACATGAGGCAAGGGCTCC      |          |
| ATP8B4 | F | semi-qPCR | GGAAGGCCCTTCGGACCTTGG     | 310      |
|        | R |           | GTCAGTCAGCATGTTGCAGGC     |          |
| ATP9A  | F | semi-qPCR | GAGGCTCACCTCGAGCTGAAC     | 271      |
|        | R |           | CCACGCCGAGTCAGATTCC       |          |
| ATP9B  | F | semi-qPCR | CAACAGCTGCCGGCTCTGG       | 373      |
|        | R |           | GATTGCGGTACCATGGACCC      |          |
| ATP10A | F | semi-qPCR | CCTTATCCCAAGTCACAGCTG     | 348      |
|        | R |           | CCGAGTCTGCCTCTGGTACC      |          |
| ATP10B | F | semi-qPCR | CAGGATCCAGCAACTATGAGAAG   | 318      |
|        | R |           | GGACACCATGACAGAGTTGCAG    |          |
| ATP10D | F | semi-qPCR | CCGAGCCACACCGCTGCAG       | 351      |
|        | R |           | CAGTAATCAGTCATGGATGTTCC   |          |
| ATP11A | F | semi-qPCR | GCTGCTGCAGGCTGCCAAAG      | 355      |
|        | R |           | GTCTCTGGTCAGGCTCCCGC      |          |
| ATP11B | F | semi-qPCR | CCTGTCAAGTGGTTCTGCTTGG    | 339      |
|        | R |           | CTTTAACAAGTAGATGAGTCCATTG |          |
| ATP11C | F | semi-qPCR | GGAACGTAATGCAATGGATGGG    | 349      |
|        | R |           | GGTTAGTTCTAAGAGCTCAGTG    |          |
| TRPC1  | F | semi-qPCR | CAGTGGGAACGACTATCCT       | 451      |
|        | R |           | TCTGCAGACTGACAACCGTAG     |          |
| TRPV1  | F | semi-qPCR | ATGACAGTGTGATGGAGAGTC     | 422      |
|        | R |           | AACAGGGCTGACTGTGATGG      |          |
| TRPV2  | F | semi-qPCR | TCTTCTTTTCGGCTTCGCT       | 575      |
|        | R |           | CTCGAGAGTTCGAGGGACAC      |          |
| TRPM7  | F | semi-qPCR | CCTGTTCAATCAAACAAGCAGAAA  | 407, 410 |
|        | R |           | GCTCTTCGTAACCTCCTCCC      |          |
| TRPP2  | F | semi-qPCR | CGGCTGATGGCTGGCTG         | 530      |
|        | R |           | CTTGTTCCCAGAGCCTCG        |          |
| PIEZ01 | F | semi-qPCR | CACCAACCTCATCAGCGACT      | 414      |
|        | R |           | AGCGACAGCATGTTCTTGGG      |          |
| PIEZ02 | F | semi-qPCR | TCTGCGGAGGCATGTTCTTC      | 432      |
|        | R |           | GGGCCAGTCTGTAGATGGTGT     |          |
| PIEZ01 | F | qPCR      | CAATGAGGAGGCCGACTACC      | 106      |
|        | R |           | GCACTCCTGCAGTTCGATGA      |          |
| CDC50A | F | qPCR      | CGATGGCGATGAACTATAACGC    | 252      |
|        | R |           | CGGTATAATCAATCTCGATCTC    |          |
| ATP11A | F | qPCR      | CACAGAGATACCCAGACAACAGG   | 131      |
|        | R |           | CAACTGCACCAGAAATATGATAAGG |          |
| GAPDH  | F | qPCR      | ATGGGGAAGGTGAAGGTCG       | 108      |
|        | R |           | GGGTCATTTCATGGCAACAATA    |          |
